# Supplementary material for: Cascade Amplification of Pyroptosis and Apoptosis for Cancer Therapy through a Black Phosphorous-Doped Thermosensitive Hydrogel
Source: MDPI journal article supplement (doi:10.3390/pharmaceutics15071830), 2023-06-26
Supplement: s1 [file s1]

# **Cascade Amplification of Pyroptosis and Apoptosis for Cancer Therapy through a Black Phosphorous-Doped Thermosensitive Hydrogel**

Qing Wu<sup>1</sup>, Qinghui Ma<sup>2</sup>, Jun Ma<sup>3</sup>, Junpeng Chen<sup>1</sup>, Baoding Zhuang<sup>1</sup>, Shanglin Yang,<sup>1</sup>  
Jinji Liu<sup>2</sup>, Shunqian Wen<sup>1\*</sup>

<sup>1</sup> Department of Hepatic-biliary-pancreatic Surgery, Affiliated Foshan Hospital of Southern Medical University, Foshan 528000, China

<sup>2</sup> Department of Oncology, Affiliated Foshan Hospital of Southern Medical University, Foshan 528000, China

<sup>3</sup> Department of Gastroenterology, Affiliated Foshan Hospital of Southern Medical University, Foshan 528000, China

**\*To whom correspondence should be addressed:**

Shunqian Wen; E-mail: wenshunqian0662@163.com

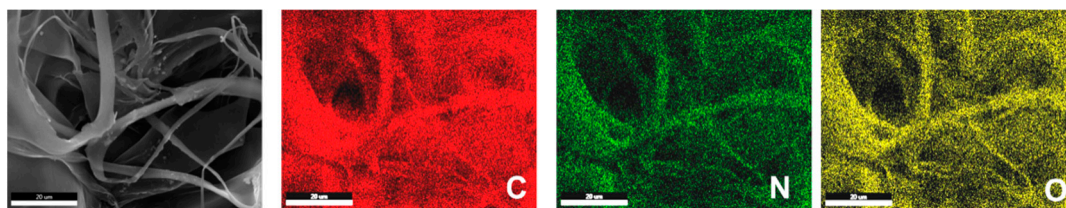

**Figure S1.** SEM photo and elemental mapping of PLEL hydrogel, scale bar = 20  $\mu\text{m}$ .

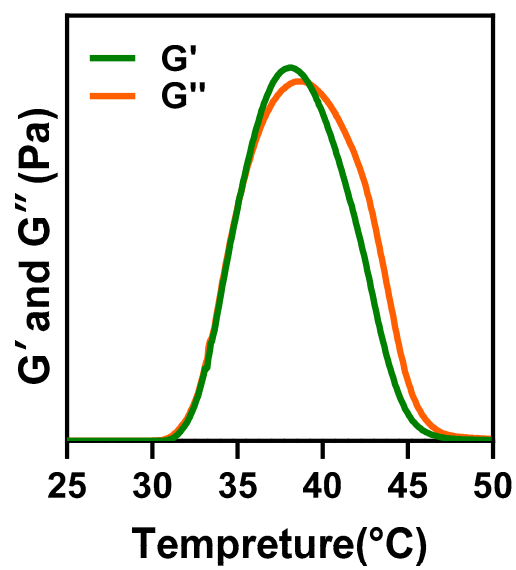

**Figure S2.** Rheological analysis of PLEL hydrogel.

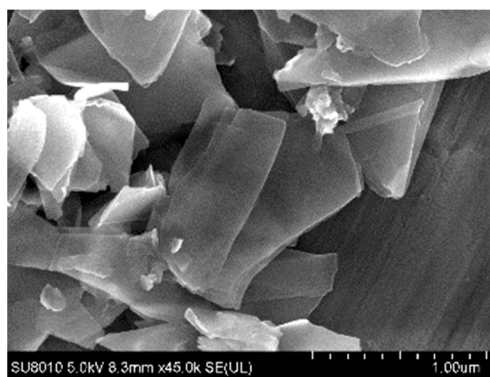

**Figure S3.** SEM photo of BP nanosheets.

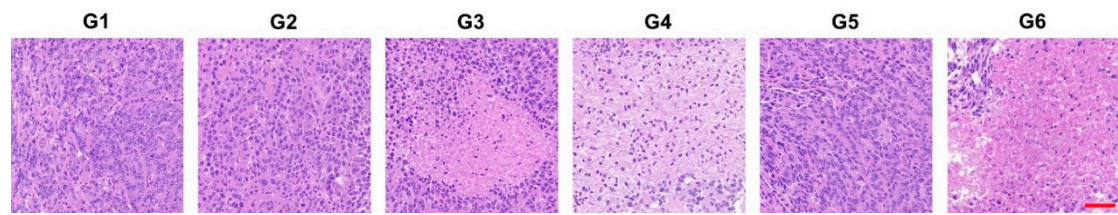

**Figure S4.** H&E staining of tumor slices from different treatment groups, scale bar = 50  $\mu\text{m}$ .

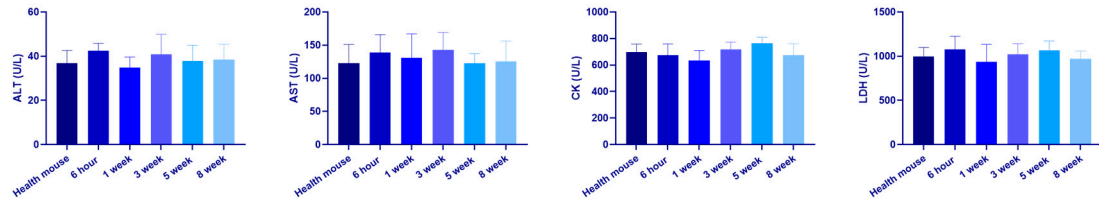

**Figure S5.** Biochemical indices of mice treated with RSL3/BP@PLEL at specific time intervals, all data are shown as mean  $\pm$  S.D. (n = 3).
